# Supplementary material
Source: MDPI journal article supplement (https://www.mdpi.com/2071-1050/12/19/7849)
Supplement: s1 [file s1]

## Sheet: Table S1 Substrates 
Substrate Composition
								usable = könnte bereits heute eingesetzt werden
	Current state	60% corn silage	100% Grass from permanent Grasslands	separated cow manure	Alternative substrate only (potential)	Substitution of corn with alternative substrates (potential)	Substitution of corn with alternative substrates, separated cow manure (potential)	Alternative substrate only (usable)	Substitution of corn with alternative substrates (usable)	Substitution of corn with alternative substrates, separated cow manure (usable)	Biogas yield [m³Biogas / t FM]	Methane content [%]	dry matter [% ]	Name of substrate in german KTBL-feasibility calculator (in German)
Corn silage	1209	5844		1209							216.1	0.52	35	Maissilage
Rye silage (whole crop)	429			429		429	429		429	429	181.4	0.523	29.4	Roggen-GPS
Corn-Cob-Mix	80			80		80	80		80	80	465	0.52	65	Maissilage, CCM
Liquid cow manure	5762	3896				5762	2881		5762	2881	30.4	0.55	10	Rindergülle mit Futterresten
Separated cow manure				1444			722			722	121.3	0.55	31.7	Rinder-Festmist
Grass from permanent grassland	8423		14153	8423	3781	715	715	13301	10235	10235	102	0.5	40	Gras, Landschaftspflege
Plant material from
a) Conservation areas					620	620	620	620	620	620	140.2	0.5	55	Gras, Landschaftspflege
b) Roadside- and buffer-strips along water courses					2400	2400	2400	0			140.2	0.5	55	Gras, Landschaftspflege
c) Grass waste from local residents					2547	2547	2547	0			140.2	0.5	55	Gras, Landschaftspflege
Biowaste					1880	1880	1880	0			123	0.6	40	Bioabfall
annual mass of substrate [t/a]	15903	9740	14153	11585	11228	14433	12274	13921	17126	14967
Annual methane-yield [m³CH4/a]	721816	721843	721803	721811	721822	721841	721838	721813	721832	721830
			ONLY Grass from permanent Grasslands	Substitution der Rindergülle durch separierte Rindergülle zur isolierten Identifikation von Vor-/Nachteilen des Verfahrens	Strikter Einsatz von alternativen Substraten (Grass from permanent grassland, plant material form conservation areas, roadside and buffer strips, grass waste, biowaste), welche potentiell genutzt werden könnten (sofern entsprechende Barrieren abgebaut werden), in der Region zur Verfügungs stehen und nicht zum Zweck der Biogasgewinnung entstanden sind	Einsatz von alternativen Substraten , welche potentiell genutzt werden könnten (sofern entsprechende Barrieren abgebaut werden) zur Substitution des derzeitigen Maisanteils	Usage of alternative substrates, that are potentially available for maize substitution including 50% Methane generation from cow manure	Strikter Einsatz von alternativen Substraten (Grass from permanent grassland, plant material form conservation areas, roadside and buffer strips, grass waste, biowaste), welche bereits heute genutzt werden könnten, in der Region zur Verfügungs stehen und nicht zum Zweck der Biogasgewinnung entstanden sind	Einsatz von alternativen Substraten, welche bereits heute genutzt werden könnten zur Substitution des derzeitigen Maisanteils	Einsatz von alternativen Substraten, welche bereits heute genutzt werden könnten zur Substitution des derzeitigen Maisanteils, zusätzlich werden 50% des Methanertrages aus der Rindergülle über separierte Rindergülle gewonnen

## Sheet: Table S2 Indicators
Indicators and weighting
												Current state	60% corn silage	100% Grass from permanent Grasslands	separated cow manure	Alternative substrate only (potential)	Substitution of corn with alternative substrates (potential)	Substitution of corn with alternative substrates, separated cow manure (potential)	Alternative substrate only (usable)	Substitution of corn with alternative substrates (usable)	Substitution of corn with alternative substrates, separated cow manure (usable)
	T A R G E T S		1. Material supply				unit	weighting (economic)	weighting (ecologic)	weighting (social)	weighting (avg)
				• Usage of potentials which do not compete with food or animal feed production	C R I T E R I A	• Use of material not directly competing with food production	[%]	1	6	9	0.0416667	89.197	40	100	#REF!	#REF!	#REF!	95.853	#REF!	#REF!	#REF!
				• Minimize material costs		• Material costs	[cent/kWhel]	9	1	3	0.0416667	14.2026	32.3838	5.88235	#REF!	#REF!	#REF!	6.81281	#REF!	#REF!	#REF!
				• Promote ecosystem based farming		• Soil quality (change in humus balance)	[tHum.C/a]	1	9	5	0.0416667	-6.69799	-93.504	62.4397	#REF!	#REF!	#REF!	-21.3599	#REF!	#REF!	#REF!
						• Fuel consumption agriculture	[L/MWhel]	4	8	2	0.0416667	1.19481	6.636	0	#REF!	#REF!	#REF!	0.458656	#REF!	#REF!	#REF!
				• Raise social acceptance of energy crops cultivation		• Share of maize plants in area	[%]	1	3	8	0.0416667	#REF!	#REF!	#REF!	#REF!	#REF!	#REF!	#REF!	#REF!	#REF!	#REF!
				• Provide and secure employment		• Working hours agriculture	[hours/a]	2	1	8	0.0416667	1491.44	888.288	1548.5	#REF!	#REF!	#REF!	1974.33	#REF!	#REF!	#REF!
			2. Logistics
				• Reduce transport costs		• Transport costs	[cent/kWhel]	9	1	2	0.05	5.2919	4.604	6.42	#REF!	#REF!	#REF!	7.80266	#REF!	#REF!	#REF!
				• Reduce environmental impacts		• Avg transport distance	[km]	1	9	6	0.05	15.6424	11.7877	13.1765	#REF!	#REF!	#REF!	18.681	#REF!	#REF!	#REF!
				• Minimize infrastructure usage		• CO2 balance transport	[gCO2/kWhel]	1	2	9	0.05	#REF!	#REF!	#REF!	#REF!	#REF!	#REF!	#REF!	#REF!	#REF!	#REF!
						• CO2 balance transport	[gCO2/kWhel]	1	2	9	0.05	10.5653	13	10	#REF!	#REF!	#REF!	16.3488	#REF!	#REF!	#REF!
				• Provide and secure employment		• Working hours transport	[hours/a]	2	1	8	0.05	1683.1	896.956	1816.3	#REF!	#REF!	#REF!	1915.79	#REF!	#REF!	#REF!
			3. Production
				• Minimize operational costs		• cost per production unit	[cent/kWhel]	9	1	4	0.0625	16.9996	18.7781	15.9658	#REF!	#REF!	#REF!	14.0149	#REF!	#REF!	#REF!
				• Assure high materials efficiency		• CO2 balance production	[gCO2/kWhel]	9	3	3	0.0625	45.3886	74.1112	51	#REF!	#REF!	#REF!	58.8104	#REF!	#REF!	#REF!
				• Reduce environmental impacts		• CO2 balance production	[gCO2/kWhel]	1	9	6	0.0625	47.2404	26.1279	63.6022	#REF!	#REF!	#REF!	24.3469	#REF!	#REF!	#REF!
				• Provide and secure employment		• Working hours plant	[hours/a]	7	1	8	0.0625	876.3	786.9	921.4	#REF!	#REF!	#REF!	798.4	#REF!	#REF!	#REF!
			4. Usage
				• Maximise profit		• Total income p.a.	[€/a]	9	1	5	0.25	124496	40937.6	169712	#REF!	#REF!	#REF!	145004	#REF!	#REF!	#REF!

## Sheet: Table S3 KTBL 
KTBL-Feasibility Calculator (Wirtschaftlichkeitsrechner) (http://daten.ktbl.de/biogas/startseite.do;jsessionid#start)
Substrat	Biogas yield [m³Biogas / t FM]	Methane content [%]	dry mass [%]	Name of Substrate in KTBL-feasibility calculator
Corn silage	216.1	0.52	35	Maissilage
Rye silage (whole crop)	181.4	0.523	29.4	Roggen-GPS
Corn-Cob-Mix	465	0.52	65	Maissilage, CCM
Liquid cow manure	30.4	0.55	10	Rindergülle mit Futterresten
Separated cow manure	121.3	0.55	31.7	Rinder-Festmist
Grass from permanent grassland	102	0.5	40	Gras, Landschaftspflege
Plant material from
a) Conservation areas	140.2	0.5	55	Gras, Landschaftspflege
b) Roadside- and buffer-strips along water courses	140.2	0.5	55	Gras, Landschaftspflege
c) Grass waste from local residents	140.2	0.5	55	Gras, Landschaftspflege
Biowaste	123	0.6	40	Bioabfall
Ergebnisse des KTBL-Wirtschaftlichkeitsrechners
			Current state	60% corn silage	100% Grass from permanent Grasslands	Substitution of corn with alternative substrates, separated cow manure (potential)
Value
Energy Output by Biogas Plant
	Electricity / Stromeinspeisung (EEG-Einspeisevergütung)		575842	541942	592224	513209
		[kWhel/a]	2787983	2788387	2787904	2788512
		[cent/kWhel] nach EEG 2012	20.6	19.4	21.2	18.4
	Heat / Wärmeverkauf		22599.6	22602.3	22599.1	22603.2
	Sum Energy Output		598442	564544	614823	535812
Costs
	Sum Variable Costs		244231	347858	205443	185119
	Deckungsbeitrag		354210	216686	409380	350693
Fix Costs
	Depretiation		170105	128400	178167	152626
		Investment [€]	2085123	1537810	2141483	1819865
	Interest due		31276.8	23067.2	32122.2	27298
	Insurance (in % of investment)		9477.83	6990.04	9734.01	8272.11
	Wages		15335.2	13770.8	16124.5	13972
		Personnel costs [Akh/a]	876.3	786.9	921.4	798.4
	Sum fix Costs		226195	172228	236148	202168
	Overall Sum in total		128016	44458.3	173232	148525
Gemeinkosten
	General costs		3520.18	3520.69	3520.08	3520.85
Calkulated Profit [€/a]			124496	40937.6	169712	145004

## Sheet: Table S4 non-competing
Use of non-competing materials
Basis for calculation: '- non-competing materials: Liquid cow manure, separated cow manure, Grass from permanent grassland, plant material (all sources), Biowaste - competing materials: Corn silage, rye silage, Corn-Cob-Mix
	Szenario
	Current state	60% corn silage	100% Grass from permanent Grasslands	Substitution of corn with alternative substrates, separated cow manure (potential)
competing materials [t/a]	1718	5844	0	509
non-competing materials [t/a]	14185	3896	14153	11765
annual mass of substrate [t/a]	15903	9740	14153	12274
Use of non-competing materials [%]	89.197	40	100	95.853

## Sheet: Table S4 Material Costs
Material costs (without transport)
Basis for Calculation: non-competing materials: Liquid cow manure, separated cow manure, Grass from permanent grassland, plant material (all sources), Biowaste competing materials: Corn silage, rye silage, Corn-Cob-Mix
- Cost for substrate from personal information of biogas plant owner in Westerstede
Substrate	Cost (without Transport) [€/t]	Current state	60% corn silage	100% Grass from permanent Grasslands	Substitution of corn with alternative substrates, separated cow manure (potential)
Corn silage	40	48360	233760	0	0
Rye silage (whole crop)	37.5	16087.5	0	0	16087.5
Corn-Cob-Mix	160	12800	0	0	12800
Liquid cow manure	0	0	0	0	0
Separated cow manure	2	0	0	0	1444
Grass from permanent grassland	3	25269	0	42459	2145
Plant material from		0	0	0	0
a) Conservation areas	3	0	0	0	1860
b) Roadside- and buffer-strips along water courses	3	0	0	0	7200
c) Grass waste from local residents	3	0	0	0	7641
Biowaste	0	0	0	0	0
Material costs per year [€/a]		102516	233760	42459	49177.5
Material costs per m³CH4 [cent/m³CH4]		14.2026	32.3838	5.88235	6.81281

## Sheet: Table S5 Humus Depletion
Humus depletion through cultivation
Basis for Calculation: non-competing materials: Liquid cow manure, separated cow manure, Grass from permanent grassland, plant material (all sources), Biowaste competing materials: Corn silage, rye silage, Corn-Cob-Mix
- Humus depletion or generation according to Reference Biogaspraxis EDER (2012)
Substrate	Humus depletion or generation via farming [kgC/ha]	Output in area [t/ha]	Current state	60% corn silage	100% Grass from permanent Grasslands	Substitution of corn with alternative substrates, separated cow manure (potential)
Corn silage	-800	50	24.18	116.88	0	0
Rye silage (whole crop)	-400	7	61.2857	0	0	61.2857
Corn-Cob-Mix	0	14	5.71429	0	0	5.71429
Liquid cow manure	0
Separated cow manure	0
Grass from permanent grassland	150	34	247.735	0	416.265	21.0294
Plant material from
a) Conservation areas	0	4	0	0	0	155
b) Roadside- and buffer-strips along water courses	0	4	0	0	0	600
c) Grass waste from local residents	0	4	0	0	0	636.75
Biowaste	0	0
Humus depletion [tC/a]			-6.69799	-93.504	62.4397	-21.3599

## Sheet: Table S6 Fuel Agriculture
Fuel consumption agriculture
Basis for Calculation non-competing materials: Liquid cow manure, separated cow manure, Grass from permanent grassland, plant material (all sources), Biowaste competing materials: Corn silage, rye silage, Corn-Cob-Mix
specific Diesel consumption of 11,06 l/t for farming maize, rye and CCM
Substrate	Diesel Consumption Production [l/t]	Current state	60% corn silage	100% Grass from permanent Grasslands	Substitution of corn with alternative substrates, separated cow manure (potential)
Corn silage	11.06	13371.5	64634.6	0	0
Rye silage (whole crop)	11.06	4744.74	0	0	4744.74
Corn-Cob-Mix	11.06	884.8	0	0	884.8
Liquid cow manure	0	0	0	0	0
Separated cow manure	0	0	0	0	0
Grass from permanent grassland	0	0	0	0	0
Plant material from
a) Conservation areas	0	0	0	0	0
b) Roadside- and buffer-strips along water courses	0	0	0	0	0
c) Grass waste from local residents	0	0	0	0	0
Biowaste	0	0	0	0	0
Diesel consumption in total [l/a]		19001.1	64634.6	0	5629.54
Substrate total [t/a]		15903	9740	14153	12274
Fuel consumption agriculture [L/t]		1.19481	6.636	0	0.458656

## Sheet: Table S7 Workhours Agriculture
Workhours agriculture
Basis for Calculation non-competing materials: Liquid cow manure, separated cow manure, Grass from permanent grassland, plant material (all sources), Biowaste competing materials: Corn silage, rye silage, Corn-Cob-Mix
- Yield per area according to BiogasPraxis, Eder 2012 - working hours for maize, Rye-silage, CCM according to BAYRISCHE LANDESANSTALT FÜR LANDWIRTSCHAFT (LfL), 2008, p. 4, "Was kosten Substrate frei Fermenter?", - Working hours for Grass form permanent Grassland according to Greimel, Handler, & Blumauer, 2004, p. 148, "Methode zur Ermittlung des einzelbetrieblichen und gesamt- österreichischen Ar…
Substrate	Working Hours [Akh/ha]	yield per area [t/ha]	spezific working hours [Akh/t]	Current state	60% corn silage	100% Grass from permanent Grasslands	Substitution of corn with alternative substrates, separated cow manure (potential)
Corn silage	7.6	50	0.152	183.768	888.288	0	0
Rye silage (whole crop)	6.3	7	0.9	386.1	0	0	386.1
Corn-Cob-Mix	0	14	0	0	0	0	0
Grass from permanent grassland	3.72	34	0.109412	921.575	0	1548.5	78.2294
Plant material from
a) Conservation areas	2	4	0.5	0	0	0	310
b) Roadside- and buffer-strips along water courses	2	4	0.5	0	0	0	1200
c) Grass waste from local residents	0	4	0	0	0	0	0
Workhours agriculture [hours/a]				1491.44	888.288	1548.5	1974.33

## Sheet: Table S7 Transport Costs
Transport costs
Basis for Calculation
- Transporting distance generated via expert interviews in the area - spezific transport costs according to BOLLMANN, C. (2013). Sachgerechte Kalkulation der Ernte- u. Transportkosten für Biogassubstrate. Einbeck, KWS Mais GmbH.
Substrate	Weight per tour [t/Fahrt]	average Transport Distance [km]	spezific Transport costs [€/t]	Current state	60% corn silage	100% Grass from permanent Grasslands	Substitution of corn with alternative substrates, separated cow manure (potential)
Corn silage	14	15	5.3	6407.7	30973.2	0	0
Rye silage (whole crop)	11	15	6.74	2891.46	0	0	2891.46
Corn-Cob-Mix	24	20	3.37	269.6	0	0	269.6
Liquid cow manure	18	10	3.56	20512.7	13869.8	0	10256.4
Separated cow manure	13	15	5.71	0	0	0	4122.62
Grass from permanent grassland	10	10	6.42	54075.7	0	90862.3	4590.3
Plant material from
a) Conservation areas	5	15	14.83	0	0	0	9194.6
b) Roadside- and buffer-strips along water courses	5	20	16.17	0	0	0	38808
c) Grass waste from local residents	10	20	8.08	0	0	0	20579.8
Biowaste	30	20	2.69	0	0	0	5057.2
Transport costs [€/a]				84157.1	44843	90862.3	95769.9
annual mass of substrate [t/a]				15903	9740	14153	12274
Transport costs [€/t]				5.2919	4.604	6.42	7.80266
Reference Bollmann

## Sheet: Table S8 CO2 Transport
CO2 emissions transport
Basis for Calculation non-competing materials: Liquid cow manure, separated cow manure, Grass from permanent grassland, plant material (all sources), Biowaste competing materials: Corn silage, rye silage, Corn-Cob-Mix
-GHG emission for truck 67,2 gCO2/t*km according to Kranke, Schmied, & Schön, 2011, p. 118 (CO2 calculation in Logistic) - average Transport distance receivec from expert interviews in the region
			Number of tours per year
Substrate	Weight per tour [t/Fahrt]	average Transport distance [km]	Current state	60% corn silage	100% Grass from permanent Grasslands	Substitution of corn with alternative substrates, separated cow manure (potential)
Corn silage	14	15	86.3571	417.429	0	0
Rye silage (whole crop)	11	15	39	0	0	39
Corn-Cob-Mix	24	20	3.33333	0	0	3.33333
Liquid cow manure	18	10	320.111	216.444	0	160.056
Separated cow manure	13	15	0	0	0	55.5385
Grass from permanent grassland	10	10	842.3	0	1415.3	71.5
Plant material from
a) Conservation areas	5	15	0	0	0	124
b) Roadside- and buffer-strips along water courses	5	20	0	0	0	480
c) Grass waste from local residents	10	20	0	0	0	254.7
Biowaste	30	20	0	0	0	62.6667
spec. GHG emission	67.2	gCO2/t*km
CO2 Emission Transport [gCO2/a]			11290944	8508864	9510816	13484688
Annual methane-yield [m³CH4/a]			721816	721843	721803	721838
CO2 emissions transport [gCO2/m³CH4]			15.6424	11.7877	13.1765	18.681

[truncated: 7 more sheets: Table S9 Transport Distance, Table S10 Workhours transport, Table S11 cost production unit, Table S12 Methane yield , Table S13 CO2 production, Table S14 Workhours plant, Table S15 Profit p.a.]
